# Supplementary figures and images for: Fingerprints of short-range and long-range structure in BaZr1−xHfxO3 solid solutions: an experimental and theoretical study
Source: Royal Society of Chemistry journal article supplement (doi:10.1039/c4cp05448b), 2015-01-01

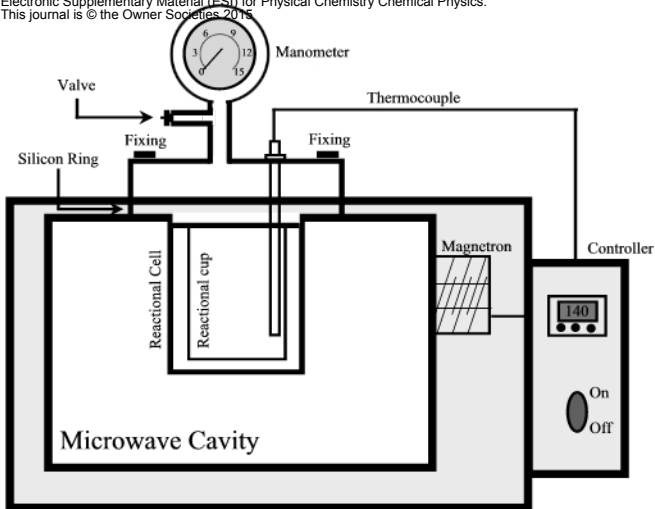

Supplement: c4cp05448b2.pdf [file c4cp05448b2.pdf]
